# Supplementary material
Source: bioRxiv or medRxiv preprint supplement (https://medrxiv.org/highwire/filestream/93735/field_highwire_adjunct_files/0/2020.08.18.20176743-1.pdf)
Supplement: Supplementary file [file 2020.08.18.20176743-1.pdf]

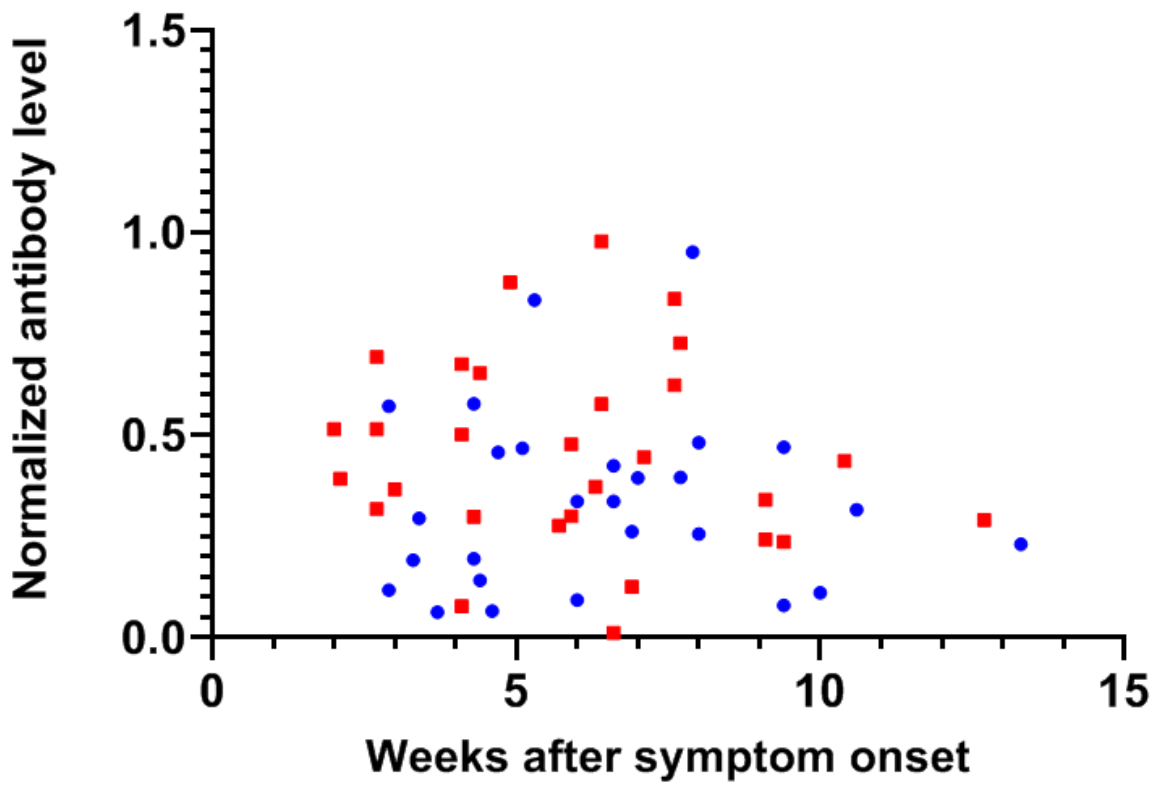

Supplemental eFigure 1. Association of normalized antibody levels in breastmilk and serum against S protein of SARS-CoV-2 using ELISA, and sampling time point in weeks after symptom onset for PCR confirmed SARS-CoV-2 infected mothers. Blue dots and red squares represent IgG levels in serum and IgA levels in milk respectively.
